# Supplementary material for: Antibiotic Resistance and the Risk of Recurrent Bacteremia
Source: PubMed Central journal article supplement — Clin Infect Dis. 2017 Dec 7;66(11):1651–7. doi: 10.1093/cid/cix1076 (PMC5960995; doi:10.1093/cid/cix1076), 2017-12-07
Supplement: cix1076_suppl_supplementary_figure_1.pdf [file cix1076_suppl_supplementary_figure_1.pdf]

### A. Enterobacteriaceae

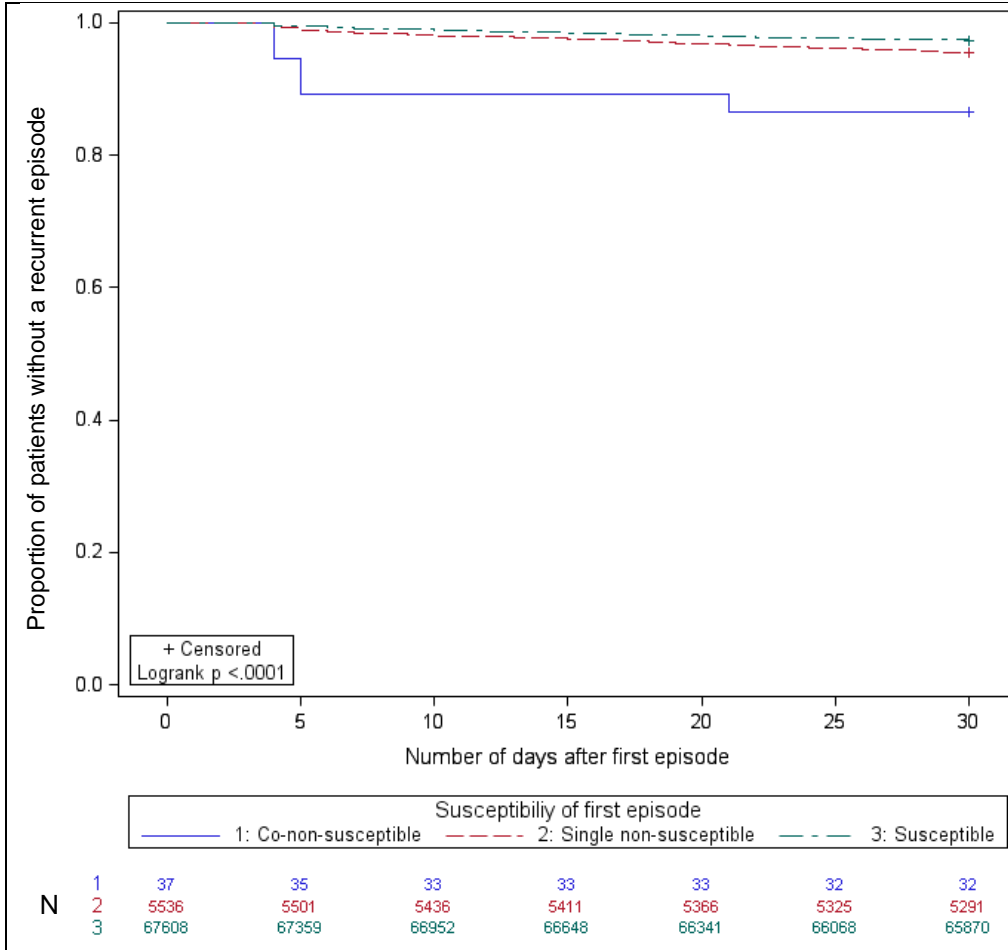

### B. Pseudomonas spp.

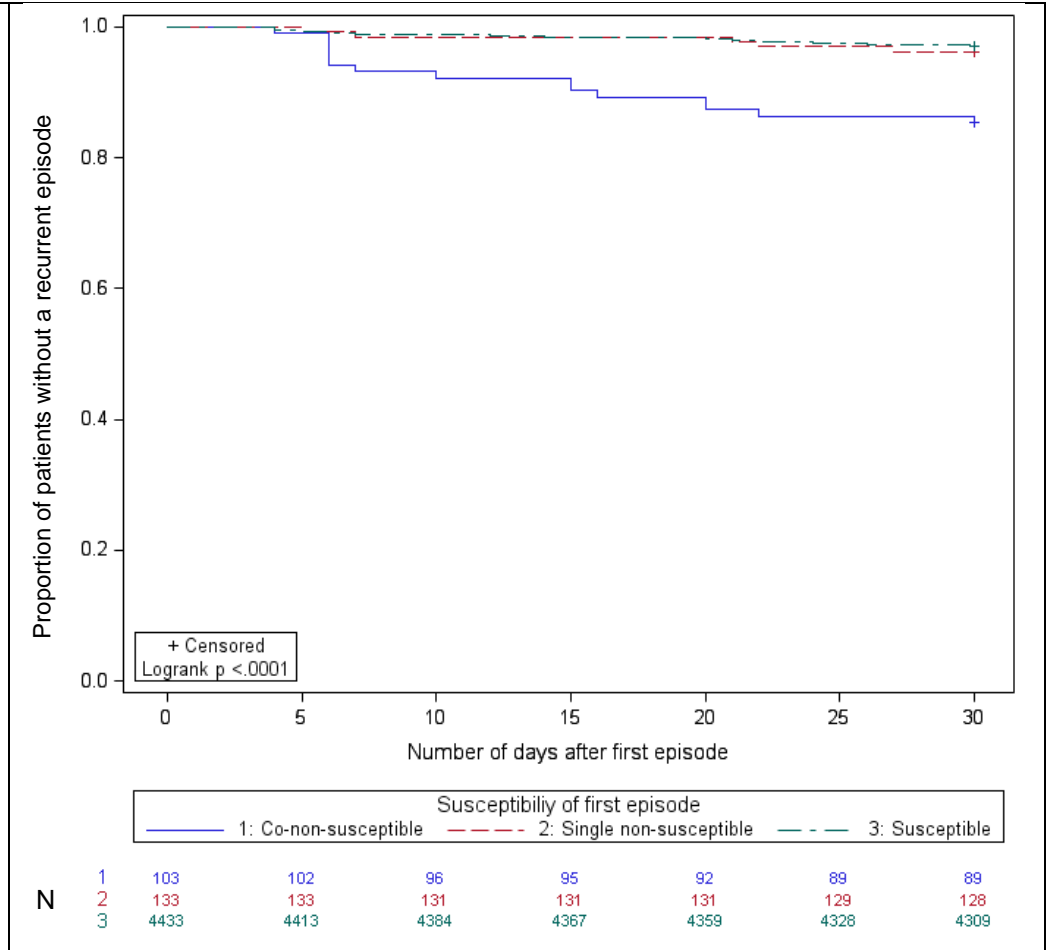

**C. *Enterococcus* spp.**

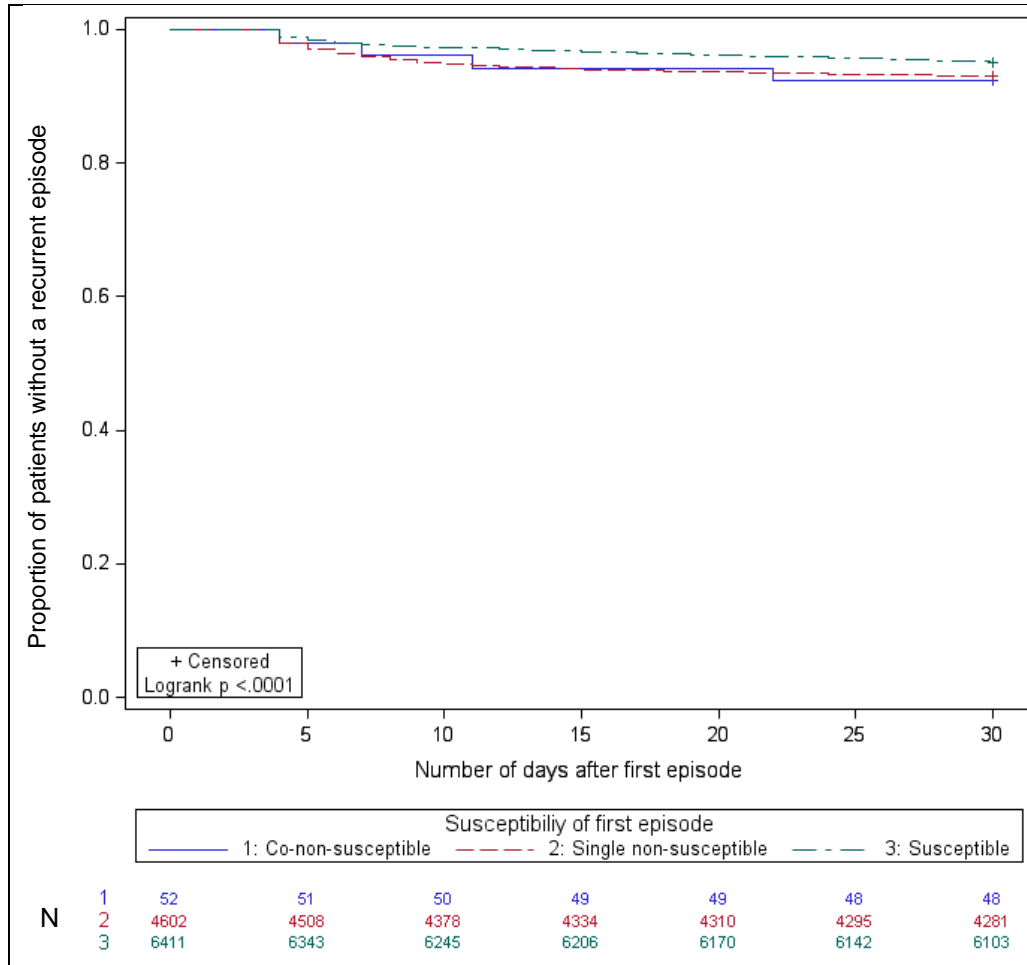

**D. *S. aureus***

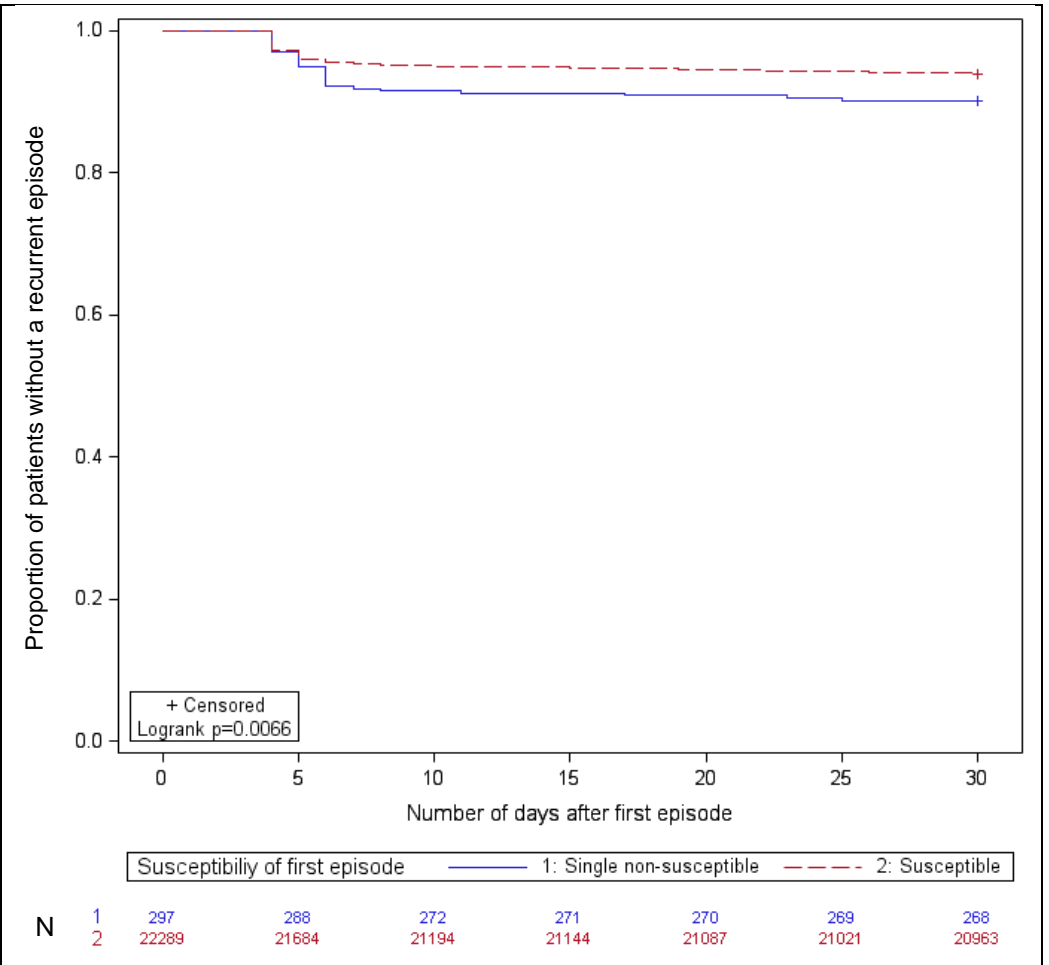

**Supplementary figure 1.** Kaplan-Meier curves displaying the proportion of patients without a recurrent episode of bacteremia, by pathogen group and susceptibility category of the first episode. (A) Enterobacteriaceae, (B) *Pseudomonas* spp., (C) *Enterococcus* spp., (D) *S. aureus*. N: number of patients at risk. A recurrent episode was defined as a positive blood culture between 4 and 30 days after the first episode, and observations were therefore censored at 30 days of follow-up.
