# Supplementary material for: Antibiotic Resistance and the Risk of Recurrent Bacteremia
Source: PubMed Central journal article supplement — Clin Infect Dis. 2017 Dec 7;66(11):1651–7. doi: 10.1093/cid/cix1076 (PMC5960995; doi:10.1093/cid/cix1076), 2017-12-07
Supplement: cix1076_suppl_supplementary_table_1.pdf [file cix1076_suppl_supplementary_table_1.pdf]

**Supplementary table 1a.** Susceptibility distribution of first bacteremias and absolute and relative risk (95% CI) of recurrent bacteremia between 4 and 15 days following single or co-non-susceptible first bacteremia, compared with susceptible first bacteremia.

| Pathogen group           | First episodes (n (%)) |                        |                    | Risk of recurrent episode by susceptibility status of first episode |                        |                |                    |
|--------------------------|------------------------|------------------------|--------------------|---------------------------------------------------------------------|------------------------|----------------|--------------------|
|                          | Susceptible            | Single non-susceptible | Co-non-susceptible | Risk                                                                | Single non-susceptible |                | Co-non-susceptible |
|                          |                        |                        |                    |                                                                     | Susceptible            | Susceptible    | Susceptible        |
| Enterobacteriaceae       | 68413 (91.4)           | 5691 (7.6)             | 39 (0.1)           | absolute (%)                                                        | 1.6 (1.5-1.6)          | 2.5 (2.1-2.9)  | 10.3 (3.8-27.3)    |
|                          |                        |                        |                    | relative                                                            |                        | 1.6 (1.4-1.9)  | 6.6 (2.5-17.7)     |
| <i>Pseudomonas</i> spp.  | 4493 (94.2)            | 142 (3.0)              | 112 (2.3)          | absolute (%)                                                        | 1.6 (1.2-2.0)          | 2.1 (0.7-6.6)  | 9.8 (5.4-17.7)     |
|                          |                        |                        |                    | relative                                                            |                        | 1.4 (0.4-4.3)  | 6.3 (3.3-11.9)     |
| <i>Enterococcus</i> spp. | 6516 (57.4)            | 4665 (41.1)            | 53 (0.5)           | absolute (%)                                                        | 3.3 (2.9-3.8)          | 6 (5.3-6.7)    | 5.7 (1.8-17.6)     |
|                          |                        |                        |                    | relative                                                            |                        | 1.8 (1.5-2.1)  | 1.7 (0.5-5.3)      |
| <i>S. aureus</i>         | 22483 (98.1)           | 304 (1.3)              |                    | absolute (%)                                                        | 5.2 (4.9-5.5)          | 8.9 (6.1-13.0) |                    |
|                          |                        |                        |                    | relative                                                            |                        | 1.7 (1.2-2.5)  |                    |

**Supplementary table 1b.** Susceptibility distribution of first bacteremias and absolute and relative risk (95% CI) of recurrent bacteremia between 4 and 60 days following single or co-non-susceptible first bacteremia, compared with susceptible first bacteremia.

| Pathogen group           | First episodes (n (%)) |                        |                    | Risk of recurrent episode by susceptibility status of first episode |                        |                |                    |
|--------------------------|------------------------|------------------------|--------------------|---------------------------------------------------------------------|------------------------|----------------|--------------------|
|                          | Susceptible            | Single non-susceptible | Co-non-susceptible | Risk                                                                | Single non-susceptible |                | Co-non-susceptible |
|                          |                        |                        |                    |                                                                     | Susceptible            | Susceptible    | Susceptible        |
| Enterobacteriaceae       | 66986 (91.6)           | 5416 (7.4)             | 36 (0.0)           | absolute (%)                                                        | 2.6 (2.5-2.7)          | 4.4 (3.9-5.0)  | 13.9 (5.8-33.4)    |
|                          |                        |                        |                    | relative                                                            |                        | 1.7 (1.5-2.0)  | 5.4 (2.2-12.9)     |
| <i>Pseudomonas</i> spp.  | 4398 (94.6)            | 130 (2.8)              | 96 (2.1)           | absolute (%)                                                        | 3.0 (2.5-3.5)          | 3.8 (1.6-9.2)  | 14.6 (8.6-24.6)    |
|                          |                        |                        |                    | relative                                                            |                        | 1.3 (0.5-3.2)  | 4.9 (2.8-8.6)      |
| <i>Enterococcus</i> spp. | 6310 (57.3)            | 4543 (41.3)            | 48 (0.4)           | absolute (%)                                                        | 4.9 (4.4-5.5)          | 6.8 (6.1-7.7)  | 6.3 (2.0-19.4)     |
|                          |                        |                        |                    | relative                                                            |                        | 1.4 (1.2-1.6)  | 1.3 (0.4-4.0)      |
| <i>S. aureus</i>         | 22082 (98.2)           | 292 (1.3)              |                    | absolute (%)                                                        | 6.0 (5.7-6.3)          | 9.9 (6.9-14.3) |                    |
|                          |                        |                        |                    | relative                                                            |                        | 1.7 (1.1-2.4)  |                    |
