# Supplementary material for: Antibiotic Resistance and the Risk of Recurrent Bacteremia
Source: PubMed Central journal article supplement — Clin Infect Dis. 2017 Dec 7;66(11):1651–7. doi: 10.1093/cid/cix1076 (PMC5960995; doi:10.1093/cid/cix1076), 2017-12-07
Supplement: cix1076_suppl_supplementary_table_2.pdf [file cix1076_suppl_supplementary_table_2.pdf]

**Supplementary table 2.** Patient and episode characteristics (n (%)) of first and first recurrent episodes of bacteraemia, by pathogen group and susceptibility category. (A) Enterobacteriaceae, (B) *Pseudomonas* spp., (C) *Enterococcus* spp., (D) *S. aureus*.

### A. Enterobacteriaceae

|                                              | First episodes |                        |                    | Recurrent episodes |                        |                    |
|----------------------------------------------|----------------|------------------------|--------------------|--------------------|------------------------|--------------------|
|                                              | Susceptible    | Single non-susceptible | Co-non-susceptible | Susceptible        | Single non-susceptible | Co-non-susceptible |
| <b>Sex</b>                                   |                |                        |                    |                    |                        |                    |
| Male                                         | 35828 (53.0)   | 3463 (62.6)            | 28 (75.7)          | 1029 (59.7)        | 191 (65.4)             | 7 (87.5)           |
| Female                                       | 31778 (47.0)   | 2073 (37.4)            | 9 (24.3)           | 695 (40.3)         | 101 (34.6)             | 1 (12.5)           |
| Unknown                                      | 2 (0.0)        | 0 (0.0)                | 0 (0.0)            | 0 (0.0)            | 0 (0.0)                | 0 (0.0)            |
| <b>Age category (y)</b>                      |                |                        |                    |                    |                        |                    |
| 0-11                                         | 1318 (1.9)     | 144 (2.6)              | 1 (2.7)            | 63 (3.7)           | 16 (5.5)               | 0 (0.0)            |
| 12-45                                        | 4329 (6.4)     | 339 (6.1)              | 4 (10.8)           | 98 (5.7)           | 16 (5.5)               | 2 (25.0)           |
| 46-65                                        | 15418 (22.8)   | 1562 (28.2)            | 13 (35.1)          | 478 (27.7)         | 102 (34.9)             | 4 (50.0)           |
| 66-75                                        | 18115 (26.8)   | 1576 (28.5)            | 8 (21.6)           | 499 (28.9)         | 84 (28.8)              | 1 (12.5)           |
| 76-85                                        | 19972 (29.5)   | 1460 (26.4)            | 9 (24.3)           | 461 (26.7)         | 56 (19.2)              | 1 (12.5)           |
| >85                                          | 8456 (12.5)    | 455 (8.2)              | 2 (5.4)            | 125 (7.3)          | 18 (6.2)               | 0 (0.0)            |
| <b>Type of care</b>                          |                |                        |                    |                    |                        |                    |
| ICU                                          | 4814 (7.1)     | 763 (13.8)             | 10 (27.0)          | 150 (8.7)          | 45 (15.4)              | 4 (50.0)           |
| Non-ICU                                      | 37964 (56.2)   | 3214 (58.1)            | 24 (64.9)          | 1194 (69.3)        | 198 (67.8)             | 4 (50.0)           |
| Outpatient departments <sup>a</sup>          | 23422 (34.6)   | 1460 (26.4)            | 2 (5.4)            | 357 (20.7)         | 45 (15.4)              | 0 (0.0)            |
| Other <sup>b</sup>                           | 355 (0.5)      | 33 (0.6)               | 1 (2.7)            | 8 (0.5)            | 0 (0.0)                | 0 (0.0)            |
| Unknown                                      | 1053 (1.6)     | 66 (1.2)               | 0 (0.0)            | 15 (0.9)           | 4 (1.4)                | 0 (0.0)            |
| <b>Acquisition of infection <sup>c</sup></b> |                |                        |                    |                    |                        |                    |
| Nosocomial                                   | 7059 (10.4)    | 1239 (22.4)            | 13 (35.1)          | 552 (32.0)         | 124 (42.5)             | 5 (62.5)           |
| Community                                    | 39795 (58.9)   | 2671 (48.2)            | 17 (45.9)          | 604 (35.0)         | 86 (29.5)              | 0 (0.0)            |
| Unknown                                      | 20754 (30.7)   | 1626 (29.4)            | 7 (18.9)           | 568 (32.9)         | 82 (28.1)              | 3 (37.5)           |
| <b>Causative pathogen</b>                    |                |                        |                    |                    |                        |                    |
| <i>Escherichia coli</i>                      | 48878 (72.3)   | 3329 (60.1)            | 5 (13.5)           | 1226 (71.1)        | 169 (57.9)             | 0 (0.0)            |
| <i>Klebsiella pneumoniae</i>                 | 7017 (10.4)    | 679 (12.3)             | 13 (35.1)          | 220 (12.8)         | 48 (16.4)              | 5 (62.5)           |
| <i>Klebsiella non-pneumoniae</i>             | 2414 (3.6)     | 110 (2.0)              | 2 (5.4)            | 61 (3.5)           | 6 (2.1)                | 0 (0.0)            |
| <i>Enterobacter cloacae</i>                  | 1853 (2.7)     | 680 (12.3)             | 4 (10.8)           | 47 (2.7)           | 37 (12.7)              | 2 (25.0)           |
| <i>Enterobacter non-cloacae</i> / undefined  | 539 (0.8)      | 221 (4.0)              | 1 (2.7)            | 10 (0.6)           | 10 (3.4)               | 0 (0.0)            |
| <i>Citrobacter</i> species                   | 807 (1.2)      | 184 (3.3)              | 1 (2.7)            | 12 (0.7)           | 6 (2.1)                | 0 (0.0)            |
| <i>Proteus</i> species                       | 3215 (4.8)     | 63 (1.1)               | 3 (8.1)            | 42 (2.4)           | 3 (1.0)                | 0 (0.0)            |
| <i>Serratia</i> species                      | 1226 (1.8)     | 93 (1.7)               | 4 (10.8)           | 71 (4.1)           | 6 (2.1)                | 0 (0.0)            |
| <i>Salmonella</i> species                    | 869 (1.3)      | 10 (0.2)               | 0 (0.0)            | 25 (1.5)           | 1 (0.3)                | 0 (0.0)            |
| <i>Morganella</i> species                    | 524 (0.8)      | 113 (2.0)              | 2 (5.4)            | 6 (0.3)            | 6 (2.1)                | 1 (12.5)           |
| <i>Pantoea</i> species                       | 113 (0.2)      | 12 (0.2)               | 0 (0.0)            | 2 (0.1)            | 0 (0.0)                | 0 (0.0)            |
| <i>Providencia</i> species                   | 77 (0.1)       | 4 (0.1)                | 0 (0.0)            | 1 (0.1)            | 0 (0.0)                | 0 (0.0)            |
| <i>Hafnia alvei</i>                          | 35 (0.1)       | 38 (0.7)               | 2 (5.4)            | 1 (0.1)            | 0 (0.0)                | 0 (0.0)            |
| Other Enterobacteriaceae                     | 41 (0.1)       | 0 (0.0)                | 0 (0.0)            | 0 (0.0)            | 0 (0.0)                | 0 (0.0)            |

Susceptible: susceptible (S) to third-generation cephalosporins and carbapenems. Single non-susceptible: (intermediate) resistant (I/R) to third-generation cephalosporins, susceptible (S) to carbapenems. Co-non-susceptible: (intermediate) resistant (I/R) to third-generation cephalosporins and carbapenems.

<sup>a</sup> Including emergency departments and day care.

<sup>b</sup> Long-term care facilities, general practices, rehabilitation centers, dialysis centers, burn wound care centers, and 'other' types of care.

<sup>c</sup> Bacteremia was considered nosocomial if the patient received inpatient care at the day of sampling, and the sample was taken >2 days after the date of admission. If the sample was taken ≤2 days after admission or if the patient received outpatient care, or an 'other' type of care, the bacteremia was defined as community-acquired. If the admission date was unknown for inpatients, or if the type of care was unknown, the acquisition was considered unknown.

## B. *Pseudomonas* spp.

|                                              | First episodes |                        |                    | Recurrent episodes |                        |                    |
|----------------------------------------------|----------------|------------------------|--------------------|--------------------|------------------------|--------------------|
|                                              | Susceptible    | Single non-susceptible | Co-non-susceptible | Susceptible        | Single non-susceptible | Co-non-susceptible |
| <b>Sex</b>                                   |                |                        |                    |                    |                        |                    |
| Male                                         | 3004 (67.8)    | 96 (72.2)              | 77 (74.8)          | 58 (51.8)          | 10 (62.5)              | 15 (75.0)          |
| Female                                       | 1429 (32.2)    | 37 (27.8)              | 26 (25.2)          | 54 (48.2)          | 6 (37.5)               | 5 (25.0)           |
| <b>Age category (y)</b>                      |                |                        |                    |                    |                        |                    |
| 0-11                                         | 90 (2.0)       | 2 (1.5)                | 1 (1.0)            | 7 (6.3)            | 0 (0.0)                | 0 (0.0)            |
| 12-45                                        | 241 (5.4)      | 15 (11.3)              | 14 (13.6)          | 11 (9.8)           | 1 (6.3)                | 3 (15.0)           |
| 46-65                                        | 1160 (26.2)    | 30 (22.6)              | 41 (39.8)          | 29 (25.9)          | 8 (50.0)               | 8 (40.0)           |
| 66-75                                        | 1311 (29.6)    | 47 (35.3)              | 28 (27.2)          | 37 (33.0)          | 4 (25.0)               | 7 (35.0)           |
| 76-85                                        | 1236 (27.9)    | 31 (23.3)              | 18 (17.5)          | 19 (17.0)          | 3 (18.8)               | 1 (5.0)            |
| >85                                          | 395 (8.9)      | 8 (6.0)                | 1 (1.0)            | 9 (8.0)            | 0 (0.0)                | 1 (5.0)            |
| <b>Type of care</b>                          |                |                        |                    |                    |                        |                    |
| ICU                                          | 648 (14.6)     | 35 (26.3)              | 35 (34.0)          | 11 (9.8)           | 6 (37.5)               | 8 (40.0)           |
| Non-ICU                                      | 2556 (57.7)    | 77 (57.9)              | 53 (51.5)          | 80 (71.4)          | 7 (43.8)               | 6 (30.0)           |
| Outpatient departments <sup>a</sup>          | 1146 (25.9)    | 21 (15.8)              | 7 (6.8)            | 20 (17.9)          | 3 (18.8)               | 2 (10.0)           |
| Other <sup>b</sup>                           | 29 (0.7)       | 0 (0.0)                | 5 (4.9)            | 1 (0.9)            | 0 (0.0)                | 3 (15.0)           |
| Unknown                                      | 54 (1.2)       | 0 (0.0)                | 3 (2.9)            | 0 (0.0)            | 0 (0.0)                | 1 (5.0)            |
| <b>Acquisition of infection <sup>c</sup></b> |                |                        |                    |                    |                        |                    |
| Nosocomial                                   | 940 (21.2)     | 58 (43.6)              | 41 (39.8)          | 34 (30.4)          | 6 (37.5)               | 7 (35.0)           |
| Community                                    | 2058 (46.4)    | 36 (27.1)              | 23 (22.3)          | 38 (33.9)          | 4 (25.0)               | 5 (25.0)           |
| Unknown                                      | 1435 (32.4)    | 39 (29.3)              | 39 (37.9)          | 40 (35.7)          | 6 (37.5)               | 8 (40.0)           |
| <b>Causative pathogen</b>                    |                |                        |                    |                    |                        |                    |
| <i>Pseudomonas aeruginosa</i>                | 4236 (95.6)    | 125 (94.0)             | 99 (96.1)          | 109 (97.3)         | 16 (100.0)             | 19 (95.0)          |
| <i>Pseudomonas non-aeruginosa</i>            | 197 (4.4)      | 8 (6.0)                | 4 (3.9)            | 3 (2.7)            | 0 (0.0)                | 1 (5.0)            |

Susceptible: susceptible (S) to ceftazidime and carbapenems. Single non-susceptible: (intermediate) resistant (I/R) to ceftazidime, susceptible (S) to carbapenems. Co-non-susceptible: (intermediate) resistant (I/R) to ceftazidime and carbapenems.

<sup>a</sup> Including emergency departments and day care.

<sup>b</sup> Long-term care facilities, general practices, rehabilitation centers, dialysis centers, burn wound care centers, and 'other' types of care.

<sup>c</sup> Bacteremia was considered nosocomial if the patient received inpatient care at the day of sampling, and the sample was taken >2 days after the date of admission. If the sample was taken ≤2 days after admission or if the patient received outpatient care, or an 'other' type of care, the bacteremia was defined as community-acquired. If the admission date was unknown for inpatients, or if the type of care was unknown, the acquisition was considered unknown.

### C. *Enterococcus* spp.

|                                              | First episodes |                        |                    | Recurrent episodes |                        |                    |
|----------------------------------------------|----------------|------------------------|--------------------|--------------------|------------------------|--------------------|
|                                              | Susceptible    | Single non-susceptible | Co-non-susceptible | Susceptible        | Single non-susceptible | Co-non-susceptible |
| <b>Sex</b>                                   |                |                        |                    |                    |                        |                    |
| Male                                         | 4443 (69.3)    | 2874 (62.5)            | 34 (65.4)          | 210 (67.5)         | 200 (62.7)             | 2 (28.6)           |
| Female                                       | 1968 (30.7)    | 1728 (37.5)            | 18 (34.6)          | 101 (32.5)         | 119 (37.3)             | 5 (71.4)           |
| <b>Age category (y)</b>                      |                |                        |                    |                    |                        |                    |
| 0-11                                         | 301 (4.7)      | 115 (2.5)              | 0 (0.0)            | 26 (8.4)           | 8 (2.5)                | 0 (0.0)            |
| 12-45                                        | 404 (6.3)      | 404 (8.8)              | 5 (9.6)            | 25 (8.0)           | 36 (11.3)              | 0 (0.0)            |
| 46-65                                        | 1549 (24.2)    | 1610 (35.0)            | 16 (30.8)          | 77 (24.8)          | 134 (42.0)             | 4 (57.1)           |
| 66-75                                        | 1866 (29.1)    | 1399 (30.4)            | 20 (38.5)          | 78 (25.1)          | 83 (26.0)              | 2 (28.6)           |
| 76-85                                        | 1819 (28.4)    | 940 (20.4)             | 10 (19.2)          | 94 (30.2)          | 52 (16.3)              | 1 (14.3)           |
| >85                                          | 472 (7.4)      | 134 (2.9)              | 1 (1.9)            | 11 (3.5)           | 6 (1.9)                | 0 (0.0)            |
| <b>Type of care</b>                          |                |                        |                    |                    |                        |                    |
| ICU                                          | 1101 (17.2)    | 2100 (45.6)            | 22 (42.3)          | 56 (18.0)          | 148 (46.4)             | 3 (42.9)           |
| Non-ICU                                      | 3683 (57.4)    | 2194 (47.7)            | 24 (46.2)          | 198 (63.7)         | 158 (49.5)             | 4 (57.1)           |
| Outpatient departments <sup>a</sup>          | 1480 (23.1)    | 266 (5.8)              | 4 (7.7)            | 47 (15.1)          | 10 (3.1)               | 0 (0.0)            |
| Other <sup>b</sup>                           | 88 (1.4)       | 24 (0.5)               | 2 (3.8)            | 9 (2.9)            | 2 (0.6)                | 0 (0.0)            |
| Unknown                                      | 59 (0.9)       | 18 (0.4)               | 0 (0.0)            | 1 (0.3)            | 1 (0.3)                | 0 (0.0)            |
| <b>Acquisition of infection <sup>c</sup></b> |                |                        |                    |                    |                        |                    |
| Nosocomial                                   | 1622 (25.3)    | 2274 (49.4)            | 20 (38.5)          | 129 (41.5)         | 180 (56.4)             | 3 (42.9)           |
| Community                                    | 2878 (44.9)    | 692 (15.0)             | 6 (11.5)           | 88 (28.3)          | 31 (9.7)               | 1 (14.3)           |
| Unknown                                      | 1911 (29.8)    | 1636 (35.5)            | 26 (50.0)          | 94 (30.2)          | 108 (33.9)             | 3 (42.9)           |
| <b>Causative pathogen</b>                    |                |                        |                    |                    |                        |                    |
| <i>Enterococcus faecalis</i>                 | 5537 (86.4)    | 27 (0.6)               | 1 (1.9)            | 282 (90.7)         | 4 (1.3)                | 0 (0.0)            |
| <i>Enterococcus faecium</i>                  | 402 (6.3)      | 4483 (97.4)            | 45 (86.5)          | 14 (4.5)           | 308 (96.6)             | 7 (100.0)          |
| Other <i>Enterococcus</i> spp.               | 472 (7.4)      | 92 (2.0)               | 6 (11.5)           | 15 (4.8)           | 7 (2.2)                | 0 (0.0)            |

Susceptible: susceptible (S) to aminopenicillins and vancomycin. Single non-susceptible: (intermediate) resistant (I/R) to aminopenicillins, susceptible (S) to vancomycin. Co-non-susceptible: (intermediate) resistant (I/R) to aminopenicillins and vancomycin.

<sup>a</sup> Including emergency departments and day care.

<sup>b</sup> Long-term care facilities, general practices, rehabilitation centers, dialysis centers, burn wound care centers, and 'other' types of care.

<sup>c</sup> Bacteremia was considered nosocomial if the patient received inpatient care at the day of sampling, and the sample was taken >2 days after the date of admission. If the sample was taken ≤2 days after admission or if the patient received outpatient care, or an 'other' type of care, the bacteremia was defined as community-acquired. If the admission date was unknown for inpatients, or if the type of care was unknown, the acquisition was considered unknown.

**D. *S. aureus***

|                                              | First episodes |                        | Recurrent episodes |                        |
|----------------------------------------------|----------------|------------------------|--------------------|------------------------|
|                                              | Susceptible    | Single non-susceptible | Susceptible        | Single non-susceptible |
| <b>Sex</b>                                   |                |                        |                    |                        |
| Male                                         | 13446 (60.3)   | 181 (60.9)             | 820 (61.1)         | 19 (63.3)              |
| Female                                       | 8843 (39.7)    | 116 (39.1)             | 521 (38.9)         | 11 (36.7)              |
| <b>Age category (y)</b>                      |                |                        |                    |                        |
| 0-11                                         | 1223 (5.5)     | 14 (4.7)               | 32 (2.4)           | 2 (6.7)                |
| 12-45                                        | 1930 (8.7)     | 39 (13.1)              | 103 (7.7)          | 3 (10.0)               |
| 46-65                                        | 6047 (27.1)    | 82 (27.6)              | 409 (30.5)         | 8 (26.7)               |
| 66-75                                        | 5273 (23.7)    | 79 (26.6)              | 356 (26.5)         | 8 (26.7)               |
| 76-85                                        | 5627 (25.2)    | 62 (20.9)              | 339 (25.3)         | 9 (30.0)               |
| >85                                          | 2189 (9.8)     | 21 (7.1)               | 102 (7.6)          | 0 (0.0)                |
| <b>Type of care</b>                          |                |                        |                    |                        |
| ICU                                          | 1966 (8.8)     | 54 (18.2)              | 209 (15.6)         | 5 (16.7)               |
| Non-ICU                                      | 14142 (63.4)   | 170 (57.2)             | 1012 (75.5)        | 25 (83.3)              |
| Outpatient departments <sup>a</sup>          | 5668 (25.4)    | 61 (20.5)              | 102 (7.6)          | 0 (0.0)                |
| Other <sup>b</sup>                           | 219 (1.0)      | 9 (3.0)                | 8 (0.6)            | 0 (0.0)                |
| Unknown                                      | 294 (1.3)      | 3 (1.0)                | 10 (0.7)           | 0 (0.0)                |
| <b>Acquisition of infection <sup>c</sup></b> |                |                        |                    |                        |
| Nosocomial                                   | 4726 (21.2)    | 84 (28.3)              | 736 (54.9)         | 16 (53.3)              |
| Community                                    | 10839 (48.6)   | 126 (42.4)             | 231 (17.2)         | 1 (3.3)                |
| Unknown                                      | 6724 (30.2)    | 87 (29.3)              | 374 (27.9)         | 13 (43.3)              |

Susceptible: MSSA. Single non-susceptible: MRSA

<sup>a</sup> Including emergency departments and day care.

<sup>b</sup> Long-term care facilities, general practices, rehabilitation centers, dialysis centers, burn wound care centers, and 'other' types of care.

<sup>c</sup> Bacteremia was considered nosocomial if the patient received inpatient care at the day of sampling, and the sample was taken >2 days after the date of admission. If the sample was taken ≤2 days after admission or if the patient received outpatient care, or an 'other' type of care, the bacteremia was defined as community-acquired. If the admission date was unknown for inpatients, or if the type of care was unknown, the acquisition was considered unknown.
