# Supplementary material for: Antibiotic Resistance and the Risk of Recurrent Bacteremia
Source: PubMed Central journal article supplement — Clin Infect Dis. 2017 Dec 7;66(11):1651–7. doi: 10.1093/cid/cix1076 (PMC5960995; doi:10.1093/cid/cix1076), 2017-12-07
Supplement: cix1076_suppl_supplementary_table_3.pdf [file cix1076_suppl_supplementary_table_3.pdf]

**Supplementary table 3.** Susceptibility distribution of first and recurrent bacteremia episodes caused by *E. coli*, *K. pneumoniae*, *P. aeruginosa*, *E. faecalis*, *E. faecium* and *S. aureus*.

|                           | <i>E. coli</i> <sup>a</sup> | <i>K. pneumoniae</i> <sup>a</sup> | <i>P. aeruginosa</i> <sup>b</sup> | <i>E. faecalis</i> <sup>c</sup> | <i>E. faecium</i> <sup>c</sup> | <i>S. aureus</i> <sup>d</sup> |
|---------------------------|-----------------------------|-----------------------------------|-----------------------------------|---------------------------------|--------------------------------|-------------------------------|
| <b>First episodes</b>     |                             |                                   |                                   |                                 |                                |                               |
| Susceptible               | 48877 (93.2)                | 7017 (90.4)                       | 4236 (94.6)                       | 5537 (99.2)                     | 402 (8.0)                      | 22289 (98.1)                  |
| Single non-susceptible    | 3329 (6.4)                  | 679 (8.7)                         | 125 (2.8)                         | 27 (0.5)                        | 4483 (89.3)                    | 297 (1.3)                     |
| Co-non-susceptible        | 5 (0.0)                     | 13 (0.2)                          | 99 (2.2)                          | 1 (0.0)                         | 45 (0.9)                       | NA                            |
| Unknown                   | 206 (0.4)                   | 57 (0.7)                          | 18 (0.4)                          | 14 (0.3)                        | 89 (1.8)                       | 125 (0.6)                     |
| <b>Recurrent episodes</b> |                             |                                   |                                   |                                 |                                |                               |
| Susceptible               | 1226 (87.4)                 | 220 (80.3)                        | 109 (74.7)                        | 282 (98.3)                      | 14 (4.2)                       | 1341 (97.3)                   |
| Single non-susceptible    | 169 (12.0)                  | 48 (17.5)                         | 16 (11.0)                         | 4 (1.4)                         | 308 (91.4)                     | 30 (2.2)                      |
| Co-non-susceptible        | 0 (0.0)                     | 5 (1.8)                           | 19 (13.0)                         | 0 (0.0)                         | 7 (2.1)                        | NA                            |
| Unknown                   | 8 (0.6)                     | 1 (0.4)                           | 2 (1.4)                           | 1 (0.3)                         | 8 (2.4)                        | 7 (0.5)                       |

<sup>a</sup> Susceptible: susceptible (S) to third-generation cephalosporins and carbapenems. Single non-susceptible: (intermediate) resistant (I/R) to third-generation cephalosporins, susceptible (S) to carbapenems. Co-non-susceptible: (intermediate) resistant (I/R) to third-generation cephalosporins and carbapenems.

<sup>b</sup> Susceptible: susceptible (S) to ceftazidime and carbapenems. Single non-susceptible: (intermediate) resistant (I/R) to ceftazidime, susceptible (S) to carbapenems. Co-non-susceptible: (intermediate) resistant (I/R) to ceftazidime and carbapenems.

<sup>c</sup> Susceptible: susceptible (S) to aminopenicillins and vancomycin. Single non-susceptible: (intermediate) resistant (I/R) to aminopenicillins, susceptible (S) to vancomycin. Co-non-susceptible: (intermediate) resistant (I/R) to aminopenicillins and vancomycin.

<sup>d</sup> Susceptible: MSSA. Single non-susceptible: MRSA

NA: not applicable
